# Supplementary material
Source: PubMed Central journal article supplement (PMC4461588)
Supplement: 15_033_Mullen.Suppl.pdf [file 15_033_Mullen.Suppl.pdf]

Supplemental Data

Cysteine Oxidation Targets Peroxiredoxins 1 and 2 for Exosomal Release through a Novel Mechanism of Redox-Dependent Secretion

Lisa Mullen,<sup>1</sup> Eva-Maria Hanschmann,<sup>2</sup> Christopher Horst Lillig,<sup>2</sup> Leonore A Herzenberg,<sup>3</sup> and Pietro Ghezzi<sup>1</sup>

Online address: <http://www.molmed.org>

The Feinstein Institute for Medical Research North Shore LIJ  
Empowering Imagination. Pioneering Discovery.\*

MATERIALS AND METHODS

Preparation of Exosomes from HEK293T Supernatants

To confirm that the pellets collected after ultracentrifugation contained the exosomes, a second method of exosome preparation was used. Exosomes were isolated from cell culture supernatants from 293T cells using the Exo-spin exosome purification kit according to the manufacturer’s instructions (Cell Guidance Systems, Cambridge, UK).

Confocal Microscopy

HEK293T cells were plated on poly-L-lysine coated glass-bottomed 35mm dishes (Mattek) and allowed to adhere for 24 h. Cells were then treated with 50 ng/mL TNF- $\alpha$  for 24 h. Culture medium was removed and cells were washed with PBS, before the addition of 4% paraformaldehyde for 10 min at room temperature. After washing with PBS, cells were treated with PBS containing 0.1% Triton x100 and incubated on ice for 20 min. Blocking was done

with 5% BSA in PBST for 1 h at RT. Anti-Prdx2 (Sigma) was used at a dilution of 1:1000 in blocking buffer overnight at 4° C. Secondary antibody was anti-mouse conjugated with Alexa Fluor 488 (Santa Cruz Biotechnology). A Zeiss LSM510 META Axiovert 200M microscope supported by LSM software was used for fluorescent imaging by laser scanning confocal microscopy. An oil 40 $\times$  objective lens was used with an argon ion laser emitting at 488 nm.

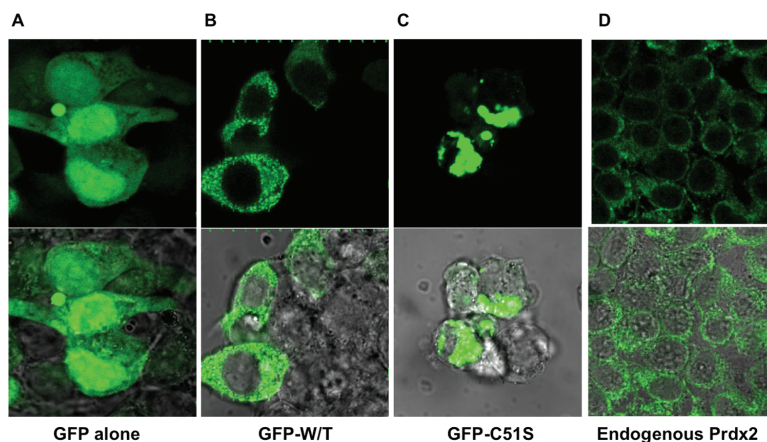

**Supplementary Figure S1.** Aggregation of GFP-Prdx2 C51S fusion protein in HEK 293T cells. Wild-type and C51S Prdx2 were expressed as GFP-fusion proteins for analysis by confocal microscopy. Upper panels – fluorescent signal images only; lower panels – fluorescence and phase contrast images. (A) Wild-type GFP-Prdx2 was visible as punctate cytoplasmic staining, in contrast to (B) the GFP control, which showed diffuse staining throughout the cytoplasm and nucleus. (C) C51S mutant GFP-fusion was present in much larger aggregates within the cytoplasm. (D) Staining of endogenous Prdx2 using anti-Prdx2 antibody followed by immunofluorescent labelling confirmed that the punctate cytoplasmic staining observed for the wild-type recombinant Prdx2 accurately reflected the localisation of the endogenous protein.

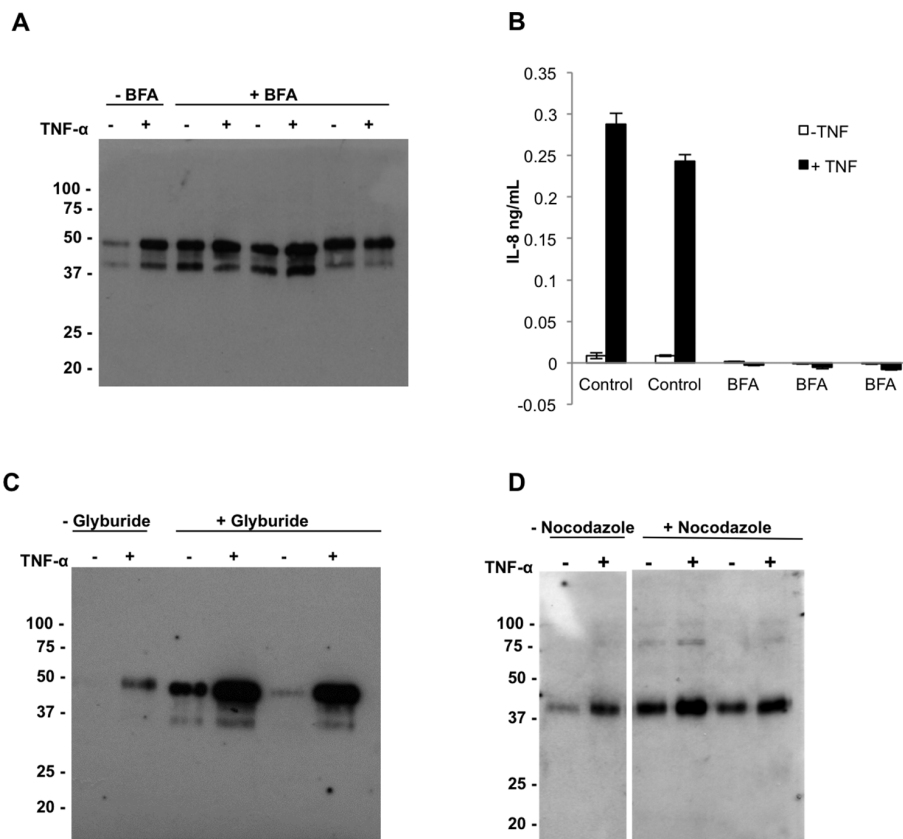

**Supplementary Figure S2.** Release of Prdx2 does not occur via the classical pathway. (A) Western blot of Prdx2 released by HEK 293T cells expressing recombinant wild-type Prdx2 in response to treatment with TNF-α in the presence and absence of BFA. (B) Release of IL-1 from HEK 293T cells in measured by ELISA. (C and D) Western blot of Prdx2 released by HEK 293T cells expressing recombinant wild-type Prdx2 in response to treatment with TNF-α in the presence and absence of glyburide (C) or nocodazole (D).

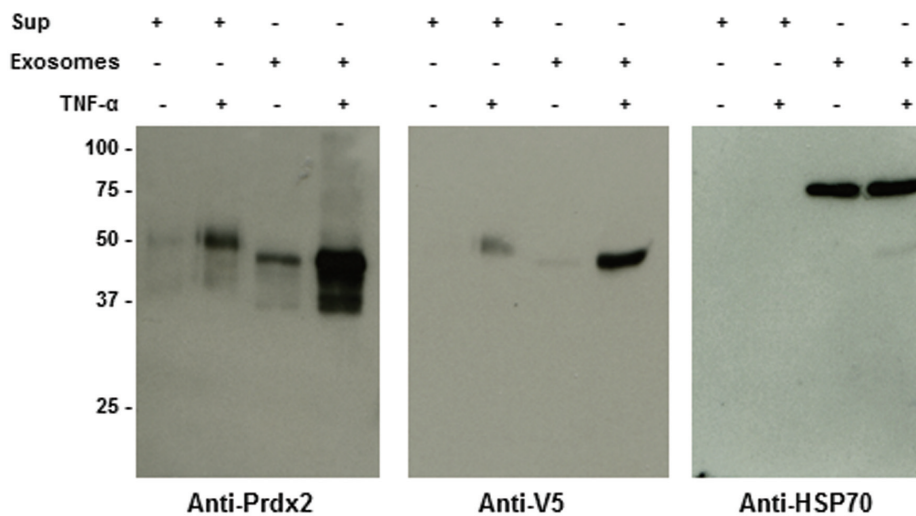

**Supplementary Figure S3.** Prdx2 is present in exosomes isolated via Exo-spin exosome purification kit. Western blot analysis of Prdx2 in cell supernatants and exosomes from HEK293T cells transiently transfected with DNA coding for Prdx2. Blots were probed with anti-Prdx2 antibody (left panel) or anti-V5 tag antibody (middle panel). The presence of exosomes was confirmed by detection of HSP70 in supernatants and exosomes (right panel).
